# Supplementary material for: Effective components of nurse-coordinated care to prevent recurrent coronary events: a systematic review and meta-analysis
Source: PubMed Central journal article supplement — Heart. 2015 Nov 13;102(1):50–6. doi: 10.1136/heartjnl-2015-308050 (PMC4717438; doi:10.1136/heartjnl-2015-308050), 2015-11-13
Supplement: heartjnl-2015-308050-s1.pdf [file heartjnl-2015-308050-s1.pdf]

Online supplement 1 MEDLINE search strategy

(systematic[sb] OR (Therapy/Broad[filter])) AND ("Coronary Disease"[Majr] OR coronary disease\*[tiab] OR coronary heart disease\*[tiab] OR cardiovascular patient\*[tiab] OR "Cardiovascular Diseases"[Majr] OR cardiovascular disease\*[tiab] OR "Coronary Artery Disease"[Majr] OR "Heart Diseases"[Majr] OR cardiac disease\*[tiab] OR "Coronary Disease"[Mesh:noexp] OR coronary risk[tiab] OR "Myocardial Infarction"[Majr] OR cardiovascular[ti] OR coronary[ti] OR cardiac[ti] OR Myocardial Infarction[ti]) AND ("Disease Management"[Mesh] OR Disease Management[tiab] OR Diseases Management[tiab] OR "Patient Education as Topic"[Mesh] OR nurse led[tiab] OR nursing management[tiab] OR nurse case management[tiab] OR case manage\*[tiab] OR registered nurse\*[tiab] OR "Nurse Practitioners"[Mesh] OR nurse practitioner\*[tiab] OR nurse coordinat\*[tiab] OR nurse delivered[tiab] OR "Nurse's Role"[MAJR] OR "Models, Nursing"[MAJR] OR "Nurse Clinicians"[Mesh] OR "Managed Care Programs/organization and administration"[Majr] OR "Case Management"[Majr] OR nurse counselor\*[tiab] OR advanced practice nurse\*[tiab] OR ((led) AND (nurse\*)) OR ((clinic) AND (nurse\*)))
