# Supplementary material for: Effective components of nurse-coordinated care to prevent recurrent coronary events: a systematic review and meta-analysis
Source: PubMed Central journal article supplement — Heart. 2015 Nov 13;102(1):50–6. doi: 10.1136/heartjnl-2015-308050 (PMC4717438; doi:10.1136/heartjnl-2015-308050), 2015-11-13
Supplement: heartjnl-2015-308050-s5.pdf [file heartjnl-2015-308050-s5.pdf]

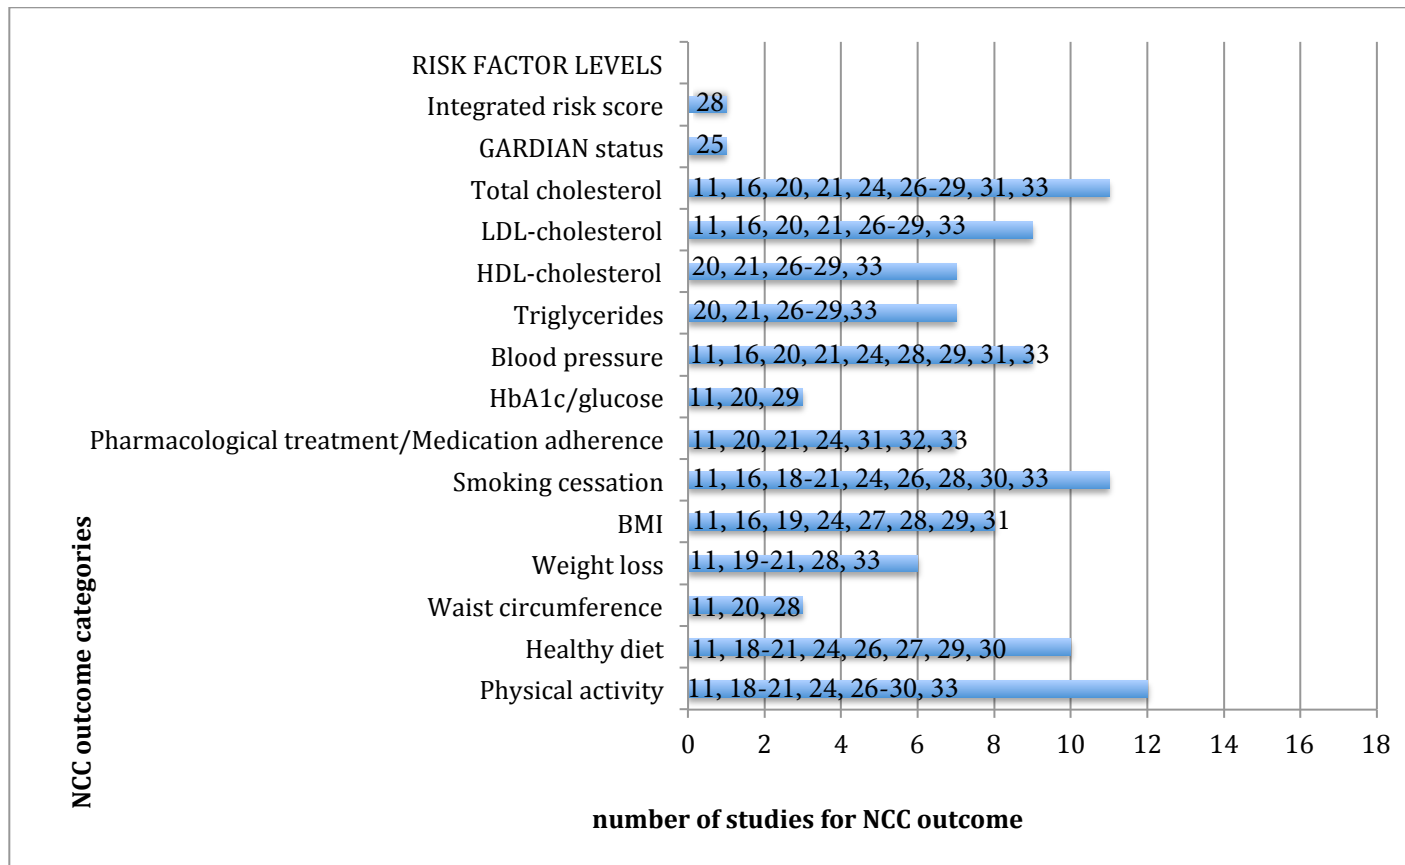

### 5a. Assessed outcomes of nurse-coordinated care by category in 18 studies

Presented numbers in figure are study references.

Abbreviations: NCC nurse-coordinated care.

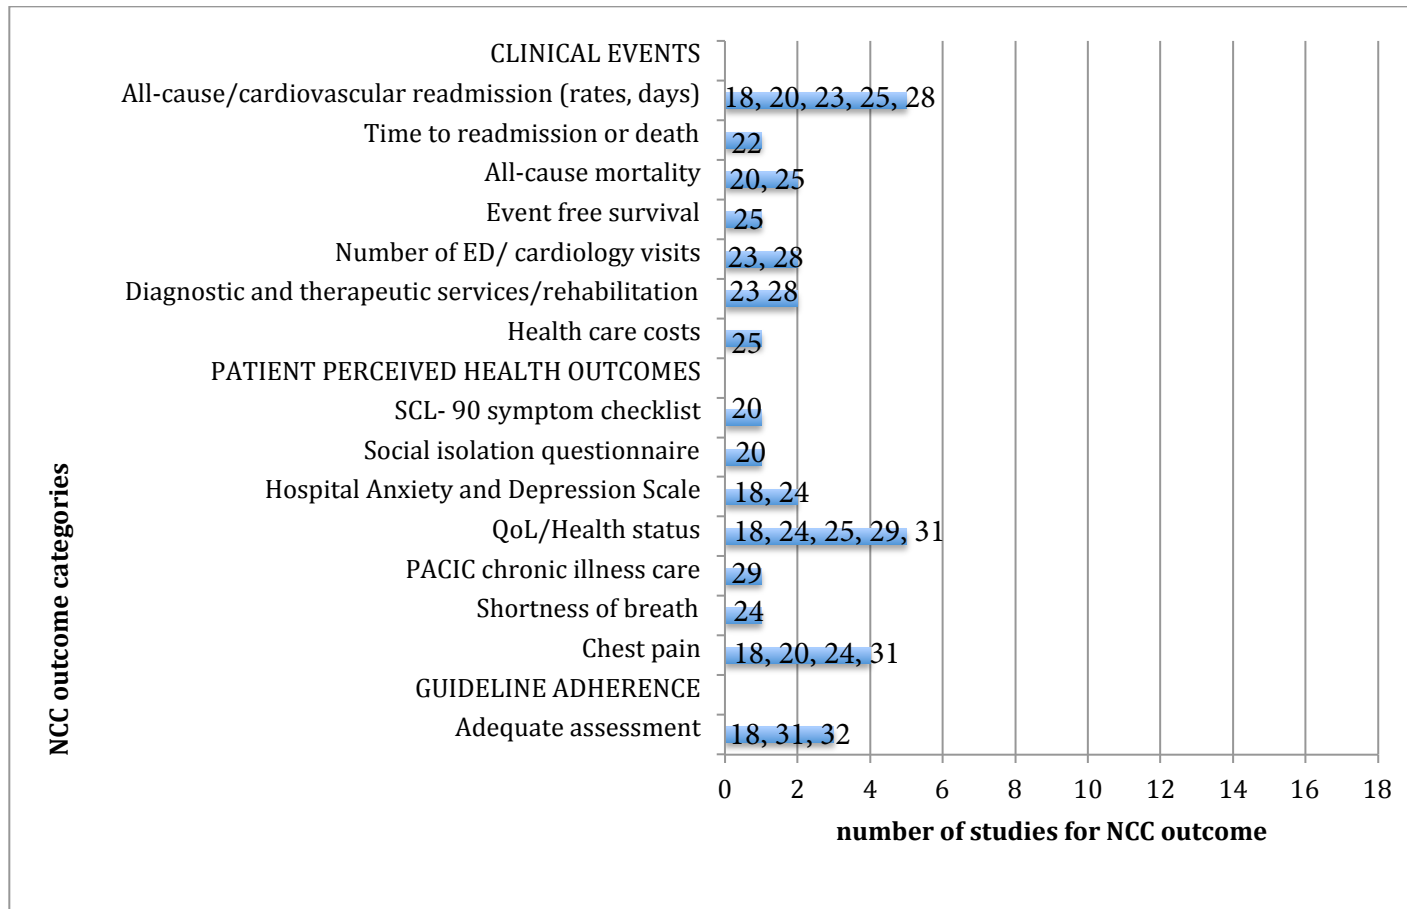

**5b. Assessed outcomes of nurse-coordinated care by category in 18 studies**

Presented numbers in figure are study references.

Abbreviations: ED emergency department; NCC nurse-coordinated care; SCL-90 Symptom Check List; QoL quality of life; PACIC Patient Assessment of Chronic Illness Care.
