# Supplementary material for: Effective components of nurse-coordinated care to prevent recurrent coronary events: a systematic review and meta-analysis
Source: PubMed Central journal article supplement — Heart. 2015 Nov 13;102(1):50–6. doi: 10.1136/heartjnl-2015-308050 (PMC4717438; doi:10.1136/heartjnl-2015-308050), 2015-11-13
Supplement: heartjnl-2015-308050-s6.pdf [file heartjnl-2015-308050-s6.pdf]

### Online supplement Description of outcomes

| Study                          | Outcome category   | Outcomes          | Unit of measurement                             | Results: difference between I and C      | Follow-up |
|--------------------------------|--------------------|-------------------|-------------------------------------------------|------------------------------------------|-----------|
| <b>Allen et al.<br/>(1996)</b> | Risk factor levels | Smoking           | Self-reported                                   | NS                                       | 12 months |
|                                |                    | BMI               | Kg/m <sup>2</sup>                               | NS                                       |           |
|                                |                    | Weight loss       | Not reported                                    | NS                                       |           |
|                                |                    |                   |                                                 | NS                                       |           |
|                                |                    | Dietary intake    | Questionnaire: dietary intake of previous month | Fat(%) p=0.008, saturated fat (%) p=0.02 |           |
|                                |                    | Physical activity | Questionnaire: 7-day activity recall            | NS                                       |           |
| <b>Allen et al.<br/>(2002)</b> | Risk factor levels | Lipids            | Total Cholesterol (mmol/L)                      | -0.4 mmol/L, p=0.008                     | 12 months |
|                                |                    |                   | LDL-C (mmol/L)                                  | -0.39 mmol/L, p=0.001                    |           |
|                                |                    |                   | HDL-C (mmol/L)                                  | NS                                       |           |
|                                |                    |                   | Triglycerides (mmol/L)                          | NS                                       |           |
|                                |                    |                   | LDL-C<2.59 mmol/L, n (%)                        | NR                                       |           |
|                                |                    | Smoking           | Exhaled carbon monoxide + self-reported         | NR                                       |           |
|                                |                    | Dietary intake    | Questionnaire: fat intake (%)                   | -3.7%, p=0.004                           |           |
|                                |                    |                   | Questionnaire: saturated fat intake (%)         | -1.4%, p=0.004                           |           |
|                                |                    |                   | Questionnaire: cholesterol intake (mg)          | -62.5 mg, p=0.017                        |           |
|                                |                    |                   | Questionnaire: fiber intake                     | NS                                       |           |
|                                |                    | Physical activity | Questionnaire: physical activity                | 18 METS, p=0.05                          |           |
| <b>Allen et al.<br/>(2011)</b> | Risk factor levels | Lipids            | Total Cholesterol (mmol/L)                      | -0.51 mmol/L, p<0.001                    | 12 months |
|                                |                    |                   | LDL-C (mmol/L)                                  | -0.41 mmol/L, p<0.001                    |           |
|                                |                    |                   | HDL-C (mmol/L)                                  | NS                                       |           |
|                                |                    |                   | Triglycerides (mmol/L)                          | -0.18 mmol/L, p=0.003                    |           |
|                                |                    | Blood pressure    | Systolic BP (mmHg)                              | -6.2 mmHg, p=0.013                       |           |
|                                |                    |                   | Diastolic BP (mmHg)                             | -3.1 mmHg, p=0.013                       |           |
|                                |                    | HbA1c             | Mean HbA1c                                      | -0.5%, p=0.034                           |           |
|                                |                    | Smoking cessation | Not reported                                    | NR                                       |           |

| Study                            | Outcome category          | Outcomes                           | Unit of measurement                              | Results: difference between I and C      | Follow-up |
|----------------------------------|---------------------------|------------------------------------|--------------------------------------------------|------------------------------------------|-----------|
|                                  |                           | BMI                                | Kg/m <sup>2</sup>                                | NS                                       |           |
|                                  |                           | Dietary intake                     | Questionnaire: Habits and History Food Frequency | NS                                       |           |
|                                  |                           | Physical activity                  | Questionnaire: Stanford 7-Day Physical Activity  | NS                                       |           |
|                                  | Perceived health outcomes | Quality of life                    | Questionnaire: EQ-5D                             | Reported elsewhere                       |           |
|                                  |                           | Perception of chronic illness care | Questionnaire: PACIC                             | 1.2 points, p<0.001                      |           |
| <b>Allison et al.<br/>(2000)</b> | Risk factor levels        | Lipids                             | Total Cholesterol (mmol/L)                       | NS                                       | 6 months  |
|                                  |                           |                                    | LDL-C (mmol/L)                                   | NS                                       |           |
|                                  |                           |                                    | HDL-C (mmol/L)                                   | NS                                       |           |
|                                  |                           |                                    | Triglycerides (mmol/L)                           | -0.37 mmol/L, p<0.001                    |           |
|                                  |                           | Blood pressure                     | Systolic BP (mmHg)                               | NS                                       |           |
|                                  |                           |                                    | Diastolic BP (mmHg)                              | NS                                       |           |
|                                  |                           | Glucose                            | Fasting blood glucose (mg/dL)                    | NS                                       |           |
|                                  |                           | Pharmacological treatment          | Pharmacological treatment rates                  | NS                                       |           |
|                                  |                           | Smoking                            | Exhaled carbon monoxide + self-reported          | NS data not applicable for meta-analysis |           |
|                                  |                           | Weight loss                        | Kg                                               | -1.0 kg, p=0.007                         |           |
|                                  |                           | Low fat diet                       | Questionnaire: no data                           | p=0.012                                  |           |
|                                  |                           | Regular exercise                   | Questionnaire (in min.)                          | 25 min, p=0.049                          |           |
|                                  | Clinical events           | <b>Recurrent events</b>            |                                                  |                                          |           |
|                                  |                           | Recurrent coronary event           | Rate                                             | -8%, p=0.002                             |           |
|                                  |                           | Rehospitalization                  | Rate                                             | NS                                       |           |
|                                  |                           | Death                              | All causes                                       | NS                                       |           |
|                                  | Perceived health outcomes | Psychosocial evaluation            | Questionnaire: SCL-90-R                          | NS                                       |           |
|                                  |                           |                                    | Questionnaire: Social isolation questionnaire    | NR                                       |           |
|                                  |                           | Chest pain                         | Reporting episodes (%)                           | NS                                       |           |

| Study                       | Outcome category          | Outcomes                                     | Unit of measurement                               | Results: difference between I and C      | Follow-up |
|-----------------------------|---------------------------|----------------------------------------------|---------------------------------------------------|------------------------------------------|-----------|
| Campbell et al.<br>(1998)   | Risk factor levels        | Aspirin management                           | On target (%)                                     | NS                                       | 12 months |
|                             |                           | Blood pressure management                    | On target (%): $\leq$ 160/90 mmHg                 | RR=1.09 (1.06-1.13)                      |           |
|                             |                           | Lipid management                             | On target (%): $\leq$ 5,2 mmol/L                  | RR=1.9 (1.59-2.29)                       |           |
|                             |                           | Smoking cessation                            | On target (self-reported) (%)                     | NS data not applicable for meta-analysis |           |
|                             |                           | Low fat diet                                 | On target (DINE-score) (%)                        | RR=1.16 (1.03-1.31)                      |           |
|                             |                           | Physical activity                            | On target (%)                                     | RR=1.35 (1.16-1.58)                      |           |
|                             | Clinical events           | Use of health service                        | Difference in length of stay (days)               | NS                                       |           |
|                             |                           |                                              | Hospital admissions (OR)                          | OR=0.64 (0.48-0.86), p=0.003             |           |
|                             | Perceived health outcomes | Anxiety and depression                       | Questionnaire: HADS                               | NS                                       |           |
|                             |                           |                                              | <b>Health status</b>                              | Questionnaire: SF-36 score               |           |
|                             |                           |                                              | Physical domain                                   | 4.33, p<0.001                            |           |
|                             |                           |                                              | Social domain                                     | 3.51, p=0.007                            |           |
|                             |                           |                                              | Role domain                                       | 8.52, p<0.001                            |           |
|                             |                           |                                              | Role emotional domain                             | 4.66, p=0.045                            |           |
|                             |                           |                                              | Mental domain                                     | NS                                       |           |
|                             |                           |                                              | Energy domain                                     | NS                                       |           |
| Pain domain                 |                           |                                              | 2.50, p=0.035                                     |                                          |           |
| General domain              |                           |                                              | 2.34, p=0.013                                     |                                          |           |
| Chest pain                  | Worsening                 | Reporting chest pain                         | OR=0.59 (0.37-0.94), p=0.025                      |                                          |           |
|                             |                           |                                              | NS                                                |                                          |           |
| Carlsson et al.<br>(1997)   | Risk factor levels        | Smoking habits                               | Questionnaire, self-reported                      | NS                                       | 12 months |
|                             |                           | Food habits                                  | Questionnaire                                     | Unclear, p=0.008                         |           |
|                             |                           | Physical activity                            | Questionnaire                                     | NS                                       |           |
| Carrington et al.<br>(2013) | Risk factor levels        | Clinical status                              | <b>GARDIAN risk status (effect sizes unknown)</b> |                                          | 24 months |
|                             |                           |                                              | Low risk group                                    | p<0.001                                  |           |
|                             |                           |                                              | Medium risk group                                 | p=0.004                                  |           |
|                             | Clinical events           | All-cause and cardiovascular hospitalization | Rate                                              | NS                                       |           |

| Study                       | Outcome category          | Outcomes                | Unit of measurement                     | Results: difference between I and C | Follow-up |
|-----------------------------|---------------------------|-------------------------|-----------------------------------------|-------------------------------------|-----------|
|                             |                           | All cause hospital stay | Days/patient per month                  | NS                                  |           |
|                             |                           | All-cause mortality     | Rate                                    | NS                                  |           |
|                             |                           | Event free survival     | Rate                                    | NS                                  |           |
|                             |                           | Health care costs       | Associated costs/patient per month      | NS                                  |           |
|                             | Perceived health outcomes | Quality of life         | Questionnaire: SF-12 (physical domain ) | NS                                  |           |
|                             |                           |                         | Questionnaire: SF-12 mental domain )    | NS                                  |           |
|                             |                           |                         | Questionnaire: EQ-5D (health state)     | NS                                  |           |
|                             |                           |                         | Potential depression                    | NS                                  |           |
| <b>DeBusk et al. (1994)</b> | Risk factor levels        | Lipids                  | Total Cholesterol (mmol/L)              | -0,63 mmol/L, p<0.001               |           |
|                             |                           |                         | LDL-C (mmol/L)                          | -0,64 mmol/L, p<0.001               |           |
|                             |                           |                         | HDL-C (mmol/L)                          | NS                                  | 12 months |
|                             |                           |                         | Triglycerides (mmol/L)                  | NS                                  |           |
|                             |                           | Smoking cessation       | Biochemically + self-reported (%)       | 17%, p=0.03                         |           |
|                             |                           | Nutritional management  | Questionnaire: food frequency           | Unclear                             |           |
|                             |                           | Functional capacity     | Treadmill exercise test (METS)          | 0.9 METS, p=0.001                   |           |
| <b>Gordon et al. (2002)</b> | Risk factor levels        | Lipids                  | Total Cholesterol (mmol/L)              | NS                                  | 12 weeks  |
|                             |                           |                         | LDL-C (mmol/L)                          | NS                                  |           |
|                             |                           |                         | HDL-C (mmol/L)                          | NS                                  |           |
|                             |                           |                         | Triglycerides (mmol/L)                  | NS                                  |           |
|                             |                           | Blood pressure          | Systolic BP (mmHg)                      | NS                                  |           |
|                             |                           |                         | Diastolic BP (mmHg)                     | NS                                  |           |
|                             |                           | Medication use          | Change in %                             | NS                                  |           |
|                             |                           | Smoking                 | Self-reported                           | NS                                  |           |
|                             |                           | Weight loss             | LBS                                     | NS                                  |           |
|                             |                           | VO2 max                 | VO2 max (ml/kg/min)                     | NS                                  |           |
| <b>Jiang et al. (2007)</b>  | Risk factor levels        | Lipids                  | Total Cholesterol (mmol/L)              | -0.33 mmol/L, p=0.001               |           |
|                             |                           |                         | LDL-C (mmol/L)                          | -0.30 mmol/L, p=0.001               | 6 months  |

| Study                        | Outcome category          | Outcomes                                                           | Unit of measurement                                          | Results: difference between I and C | Follow-up |
|------------------------------|---------------------------|--------------------------------------------------------------------|--------------------------------------------------------------|-------------------------------------|-----------|
|                              |                           |                                                                    | HDL-C (mmol/L)                                               | NS                                  |           |
|                              |                           |                                                                    | Triglycerides (mmol/L)                                       | -0.10 mmol/L, p=0.011               |           |
|                              |                           | Blood pressure                                                     | Systolic BP (mmHg)                                           | NS                                  |           |
|                              |                           |                                                                    | Diastolic BP (mmHg)                                          | NS                                  |           |
|                              |                           | Medication adherence                                               | Self-reported                                                | NS                                  |           |
|                              |                           | Smoking                                                            | Self-reported                                                | NS                                  |           |
|                              |                           | Weight                                                             | Kg                                                           | NS                                  |           |
|                              |                           | Diet                                                               | Mean no. of patients with step II diet adherence             | -10.28, p=0.002 (netto change)      |           |
|                              |                           | Walking                                                            | Activity total score: Jenkins Activity Checklist for Walking | 1.91, p=0.002 (netto change)        |           |
| <b>Jolly et al. (1999)</b>   | Risk factor levels        | Lipids                                                             | Total Cholesterol (mmol/L)                                   | NS                                  | 12 months |
|                              |                           | Blood pressure                                                     | Systolic and diastolic differences (mmHg)                    | NS                                  |           |
|                              |                           | Pharmacological treatment                                          | Difference in prescribed drugs (%)                           | NS                                  |           |
|                              |                           | Smoking cessation                                                  | Biochemically + self-reported (%)                            | NS                                  |           |
|                              |                           | BMI                                                                | Kg/m <sup>2</sup>                                            | NS                                  |           |
|                              |                           | Diet                                                               | Mean difference in score for intake (self-reported)          | NS                                  |           |
|                              |                           | Exercise                                                           | Distance walked in 6 min. (test)                             | NS                                  |           |
|                              | Clinical events           | Practice attendance                                                | Difference in mean no. of visits                             | NS                                  |           |
|                              |                           | Rehabilitation                                                     | Attendance at at least one session (%)                       | 18%, p<0.001                        |           |
|                              | Perceived health outcomes | Anxiety                                                            | Questionnaire: HADS subscale                                 | NS                                  |           |
|                              |                           | Depression                                                         | Questionnaire: HADS subscale                                 | NS                                  |           |
|                              |                           | Quality of life                                                    | Questionnaire: EuroQol                                       | NS                                  |           |
|                              |                           | Shortness of breath                                                | Self-reported (%)                                            | NS                                  |           |
|                              |                           | Chest pain                                                         | Self-reported (%)                                            | NS                                  |           |
| <b>Jorstad et al. (2013)</b> | Risk factor levels        | 10-year cardiovascular mortality (SCORE)                           | Estimation of SCORE risk reduction (%)                       | -17.4%, p=0.021                     | 12 months |
|                              |                           | Reduction of 10-year incidence of coronary mortality and morbidity | Framingham Coronary Risk Score (FCRS)                        | -12.5%, p=0.017                     |           |

| Study                       | Outcome category   | Outcomes                      | Unit of measurement        | Results: difference between I and C | Follow-up |  |
|-----------------------------|--------------------|-------------------------------|----------------------------|-------------------------------------|-----------|--|
|                             | Clinical events    | Lipids                        | Total Cholesterol (mmol/L) | NS                                  |           |  |
|                             |                    |                               | LDL-C (mmol/L)             | NS                                  |           |  |
|                             |                    |                               | HDL-C (mmol/L)             | NS                                  |           |  |
|                             |                    |                               | Triglycerides (mmol/L)     | NS                                  |           |  |
|                             |                    | Blood pressure                | Systolic BP (mmHg)         | -4.3 mmHg, p=0.002                  |           |  |
|                             |                    |                               | Diastolic BP (mmHg)        | NS                                  |           |  |
|                             |                    | Smoking                       | Self-reported              | NS                                  |           |  |
|                             |                    | BMI                           | Kg/m2                      | NS                                  |           |  |
|                             |                    | Weight                        | Kg                         | NS                                  |           |  |
|                             |                    | Waist circumference           | Cm                         | -2.1 cm , p=0.048                   |           |  |
|                             |                    | Total number of readmissions  | N (%)                      | -22%, p=0.023                       |           |  |
|                             |                    | Readmissions for ACS          | N (%)                      | NS                                  |           |  |
|                             |                    | Other CVD readmissions        | N (%)                      | -48%, p<0.001                       |           |  |
|                             |                    | Elective interventions        | N (%)                      | NS                                  |           |  |
| <b>Khunti et al. (2007)</b> | Risk factor levels | Total cholesterol             | Total Cholesterol (mmol/L) | - 0.18 mmol/L (-0.30, -0.05)        | 12 months |  |
|                             |                    | Systolic BP                   | mmHg                       | -4.58 mmHg (-6.88, -2.28)           |           |  |
|                             |                    | Diastolic BP                  | mmHg                       | -3.53 mmHg (-4.78, -2.29)           |           |  |
|                             |                    | ACE inhibitor                 | Prescribed drugs (OR)      | NS                                  |           |  |
|                             |                    | Aspirin                       | Prescribed drugs (OR)      | NS                                  |           |  |
|                             |                    | Beta-blocker                  | Prescribed drugs (OR)      | 1.43 (1.19-1.99)                    |           |  |
|                             |                    | Lipid lowering medication     | Prescribed drugs (OR)      | 1.99 (1.06-3.74)                    |           |  |
|                             |                    | BMI                           | Kg/m2                      | NS                                  |           |  |
|                             | Process of care    | <b>Risk factor management</b> |                            |                                     |           |  |
|                             |                    | Cholesterol measured          | OR                         | NS                                  |           |  |
|                             |                    | Cholesterol < 5mmol/L         | OR                         | 1.58 (1.05-2.37)                    |           |  |
|                             |                    | BP measured                   | OR                         | 22.61 (6.47-70.13)                  |           |  |
|                             |                    | BP < 140/85 mmHg              | OR                         | 1.61 (1.22-2.37)                    |           |  |
|                             |                    | Smoking status recorded       | OR                         | 33.96 (14.49-79.62)                 |           |  |
| BMI/weight measured         | OR                 | 10.14 (4.99-20.55)            |                            |                                     |           |  |

| Study                          | Outcome category          | Outcomes                             | Unit of measurement                             | Results: difference between I and C | Follow-up |
|--------------------------------|---------------------------|--------------------------------------|-------------------------------------------------|-------------------------------------|-----------|
|                                | Perceived health outcomes | <b>Quality of life</b>               | Questionnaire: SF-36                            |                                     |           |
|                                |                           | Physical functioning                 |                                                 | 5.33, p=0.02                        |           |
|                                |                           | Role physical                        |                                                 | NS                                  |           |
|                                |                           | Body pain                            |                                                 | NS                                  |           |
|                                |                           | General health                       |                                                 | 2.56, p=0.0001                      |           |
|                                |                           | Vitality                             |                                                 | 5.53, p=0.0001                      |           |
|                                |                           | Social functioning                   |                                                 | 7.76, p=0.0002                      |           |
|                                |                           | Role emotional                       |                                                 | NS                                  |           |
|                                |                           | Mental health                        |                                                 | 4.49, p=0.001                       |           |
|                                |                           | <b>Angina pectoris</b>               | Questionnaire: Seattle Angina Questionnaire     |                                     |           |
|                                |                           | Exertional capacity                  |                                                 | 5.25, p=0.001                       |           |
|                                |                           | Angina stability                     |                                                 | NS                                  |           |
|                                |                           | Angina frequency                     |                                                 | 2.69, p=0.045                       |           |
|                                |                           | Treatment satisfaction               |                                                 | NS                                  |           |
|                                |                           | Quality of life                      |                                                 | NS                                  |           |
| <b>Meisinger et al. (2013)</b> | Clinical events           | First unplanned readmission or death | Time-to-event from initial discharge (HR)       | NS                                  | 12 months |
|                                |                           | Intervention costs                   |                                                 | Reported elsewhere                  |           |
|                                | Perceived health outcomes | Functional ability                   | Questionnaires: the Barthel Index, HAQ-DI, IADL | Not yet been published              |           |
|                                |                           | Social support                       | Questionnaire: F-sozU                           |                                     |           |
|                                |                           | Depressive symptoms                  | Questionnaire: GDS                              |                                     |           |
|                                |                           | Emotional well-being                 | Questionnaire: WHO-5                            |                                     |           |
|                                |                           | Cognitive function                   | MMSE                                            |                                     |           |
| <b>Moher et al. (2001)</b>     | Risk factor levels        | <b>Pharmacological treatment</b>     |                                                 |                                     | 18 months |
|                                |                           | Antiplatelets                        | Mean (range percentage)                         | Nurse-Audit: 10%, p=0.009           |           |
|                                |                           | Hypotensive                          | Mean (range percentage)                         | NS                                  |           |
|                                |                           | Lipid lowering                       | Mean (range percentage)                         | NS                                  |           |
|                                | Process of care           | Overall adequate assessment          | Mean (range percentage)                         | Nurse: 85%, GP:76%, Audit: 52%      |           |
|                                |                           |                                      |                                                 | Nurse vs. audit p<0.001             |           |
|                                |                           |                                      |                                                 | GP vs. Audit p=0.002                |           |

| Study                             | Outcome category   | Outcomes                       | Unit of measurement                                                            | Results: difference between I and C       | Follow-up |
|-----------------------------------|--------------------|--------------------------------|--------------------------------------------------------------------------------|-------------------------------------------|-----------|
|                                   |                    | <b>Adequate assessment of:</b> |                                                                                |                                           |           |
|                                   |                    | Blood pressure                 | Mean (range percentage)                                                        | GP:97%, Audit:86%, p<0.001                |           |
|                                   |                    | Cholesterol                    | Mean (range percentage)                                                        | Nurse:88%, Audit:67%, p=0.001             |           |
|                                   |                    | Smoking status                 | Mean (range percentage)                                                        | Nurse:95%, Audit:78%, p=0.001             |           |
| <b>Voogdt-Pruis et al. (2010)</b> | Risk factor levels | Lipids                         | Total Cholesterol (mmol/L)                                                     | -0.2 mmol/L, p=0.009                      | 12 months |
|                                   |                    |                                | LDL-C (mmol/L)                                                                 | NS                                        |           |
|                                   |                    | Blood pressure                 | Systolic BP                                                                    | NS                                        |           |
|                                   |                    | Smoking cessation              | Self-reported                                                                  | NS                                        |           |
|                                   |                    | BMI                            | BMI (kg/m2)                                                                    | NS                                        |           |
| <b>Wood et al. (2008)</b>         | Risk factor levels | Lipids                         | Total Cholesterol <5 mmol/L                                                    | NS                                        | 12 months |
|                                   |                    |                                | LDL-C (<3mmol/L)                                                               | NS                                        |           |
| <b>Hospital arm</b>               |                    | Blood pressure                 | BP < 140/90 mmHg                                                               | 10.4%, p=0.04                             |           |
|                                   |                    | HbA1C                          | Difference (%)                                                                 | NS                                        |           |
|                                   |                    | ACE inhibitor                  | Difference (%)                                                                 | NS                                        |           |
|                                   |                    | Antiplatelet drug              | Difference (%)                                                                 | NS                                        |           |
|                                   |                    | Beta-blocker                   | Difference (%)                                                                 | NS                                        |           |
|                                   |                    | Statin                         | Difference (%)                                                                 | NS                                        |           |
|                                   |                    | Not smoking                    | Exhaled carbon monoxide + self-reported                                        | NS data not incorporated in meta-analysis |           |
|                                   |                    | BMI                            | BMI < 25 kg/m2                                                                 | NS                                        |           |
|                                   |                    | Weight loss                    | Weight loss $\geq$ 5% in patients with BMI >25 kg/m2 at initial assessment (%) | NS                                        |           |
|                                   |                    | Waist circumference            | Women <80cm, men <94cm                                                         | NS                                        |           |
|                                   |                    | <b>Diet</b>                    | <b>Questionnaire: food habits</b>                                              |                                           |           |
|                                   |                    |                                | Saturated fat <10% of total energy (table 3) (%)                               | 17.4%, p=0.009                            |           |
|                                   |                    |                                | Saturated fat <10% of total energy (p.2003) (%)                                | NS                                        |           |
|                                   |                    |                                | Eating oily fish $\geq$ 3 times per week (%)                                   | 8.9%, p=0.04                              |           |
|                                   |                    |                                | Eating fruit/vegetables >400 gr per day (table 3) (%)                          | 37.3%, p=0.004                            |           |
|                                   |                    |                                | Eating fruit/vegetables >400 gr per day (p.2003) (%)                           | 15.8%, p=0.03                             |           |
|                                   |                    | Physical activity              | Physical activity $\geq$ 30 min. $\geq$ 4 times per week (%)                   | 35.6%, p=0.002                            |           |



| Study                  | Outcome category | Outcomes                                  | Unit of measurement                       | Results: difference between I and C | Follow-up |
|------------------------|------------------|-------------------------------------------|-------------------------------------------|-------------------------------------|-----------|
| Young et al.<br>(2003) | Clinical events  | All-cause readmission days                | Days per 1000 follow-up days (IDR)        | 1.53, p<0.001                       | 454 days  |
|                        |                  | Readmission days for angina, CHF and COPD | Days per 1000 follow-up days (IDR)        | 1.59, p<0.001                       |           |
|                        |                  | ED visits                                 | Number of ED visits                       | 2.08, p<0.001                       |           |
|                        |                  | Physician visits                          |                                           | NS                                  |           |
|                        |                  | Diagnostic and therapeutic services       | Absolute numbers (<225 days of discharge) | -378, p=0.012                       |           |
|                        |                  | Laboratory services                       | Absolute numbers (<225 days of discharge) | -920, p=0.007                       |           |

#### Abbreviations:

A: Audit group, ACE: Angiotensin converting enzyme, ACS: Acute Coronary Syndrome, BMI: Body mass index, BP: Blood pressure, C: Control, CHF: Chronic Heart Failure, Cm: Centimeters, ED: Emergency Department EQ-5D: 5 item EuroQoL questionnaire, GP: General practitioner, HDL-C: High density lipoprotein cholesterol, I: Intervention, kg: Kilograms, LDL: Low density lipoprotein, Mg: Milligram, MET(S): Metabolic Equivalent Task, NR: Not reported, NS: Non-significant, OR: Odds ratio, PACIC: Patient assessment of chronic illness care, QoL: Quality of life, RR: Relative Risk .
