# Supplementary material for: Effective components of nurse-coordinated care to prevent recurrent coronary events: a systematic review and meta-analysis
Source: HighWire-hosted journal article supplement (doi:10.1136/heartjnl-2015-308050), 2015-11-13
Supplement: heartjnl-2015-308050supp4.pdf [file heartjnl-2015-308050supp4.pdf]

|                    | Random sequence generation (selection bias) | Allocation concealment (selection bias) | Blinding of outcome assessment (detection bias) | Incomplete outcome data (attrition bias) | Selective reporting (reporting bias) | Other bias |
|--------------------|---------------------------------------------|-----------------------------------------|-------------------------------------------------|------------------------------------------|--------------------------------------|------------|
| 1994, DeBusk       | +                                           | +                                       | -                                               | +                                        | -                                    | +          |
| 1996, Allen        | +                                           | +                                       | -                                               | +                                        | -                                    | -          |
| 1997, Carlsson     | ?                                           | ?                                       | ?                                               | -                                        | -                                    | -          |
| 1998a, Campbell    | +                                           | -                                       | ?                                               | +                                        | +                                    | +          |
| 1999, Jolly        | +                                           | ?                                       | +                                               | -                                        | +                                    | +          |
| 2000, Allison      | +                                           | +                                       | -                                               | ?                                        | +                                    | ?          |
| 2001, Moher        | +                                           | +                                       | +                                               | +                                        | +                                    | -          |
| 2002, Allen        | +                                           | +                                       | ?                                               | -                                        | ?                                    | -          |
| 2002, Gordon       | ?                                           | ?                                       | ?                                               | +                                        | -                                    | +          |
| 2003, Young        | +                                           | +                                       | +                                               | +                                        | +                                    | ?          |
| 2007, Jiang        | +                                           | +                                       | +                                               | -                                        | +                                    | ?          |
| 2007, Khunti       | +                                           | +                                       | -                                               | +                                        | +                                    | ?          |
| 2008, Wood         | +                                           | ?                                       | ?                                               | -                                        | -                                    | -          |
| 2010, Voogdt-Pruis | +                                           | +                                       | ?                                               | -                                        | +                                    | -          |
| 2011, Allen        | +                                           | +                                       | ?                                               | +                                        | +                                    | +          |
| 2013, Carrington   | +                                           | +                                       | +                                               | +                                        | +                                    | +          |
| 2013, Jorstad      | +                                           | +                                       | +                                               | +                                        | +                                    | +          |
| 2013, Meisinger    | +                                           | +                                       | +                                               | +                                        | +                                    | +          |

Risk of bias in included studies
